# Supplementary material for: Solvent-free methylthiomethyllithium [LiCH2SMe]∞: solid state structure and thermal decomposition
Source: Royal Society of Chemistry journal article supplement (doi:10.1039/b505096k), 2005-01-01

# **Supplementary Material**

**for the paper**

**Solvent-Free Methylthiomethylithium  $[\text{LiCH}_2\text{SMe}]_\infty$ : Solid State Structure and Thermal Decomposition.**

**Kai Ruth, Robert E. Dinnebier, Stefan W. Tönnies, Edith Alig, Ingeborg Sängler, Hans-Wolfram Lerner, and Matthias Wagner**

## 1. Thermolysis Details:

The capillaries were dried by repeated cycles of heating followed by application of a dynamic vacuum and subsequent storage of the capillary in vacuo overnight. Since the screw-cap of the vial was made of plastic, higher temperatures could not be applied; the vials were thus dried just by storing them at room temperature in a dynamic vacuum for four hours.

## 2. Structure Solution and Refinement Details:

A high resolution X-ray powder diffraction pattern of  $[\text{LiCH}_2\text{SMe}]_\infty$  was recorded at room temperature on a laboratory powder diffractometer (D-8, Bruker, Cu-K $\alpha_1$  radiation from primary Ge(111)-Johanson-type monochromator; V $\alpha$ ntag-1 position sensitive detector ) in Debye-Scherrer geometry with the sample sealed in a lithium borate glass capillary of 0.5 mm diameter (Hilgenberg glass No. 50). Data were taken from 8.0 – 68.0° 2 $\Theta$  at a speed of 0.05°/minute. The step width was 0.017° 2 $\Theta$ . The sample was spun during measurement for better particle statistics.

Data reduction on the powder diffraction pattern was performed using GUF1.<sup>1</sup> Indexing with ITO<sup>2</sup> led to a primitive monoclinic unit cell for  $[\text{LiCH}_2\text{SMe}]_\infty$ . Application of the extinction rules revealed  $P2_1/c$  as the most probable space group. The number of formula units per unit cell was calculated to be  $Z = 4$  from volume increments. The peak profiles and precise lattice parameters for all powder patterns were determined by LeBail-type fits<sup>3</sup> using the program GSAS<sup>4</sup>. The background was modeled manually using GUF1. The peak-profile was described by a pseudo-Voigt function in combination with a special function that accounts for the asymmetry due to axial divergence<sup>5, 6</sup>. The powder pattern of  $[\text{LiCH}_2\text{SMe}]_\infty$  exhibits severe anisotropic peak broadening caused by lattice strain. The phenomenological strain model of Stephens<sup>7</sup> as implemented in GSAS was used to model the anisotropy of the FWHM. Nine parameters were refined for the monoclinic phase.

The crystal structure of  $[\text{LiCH}_2\text{SMe}]_\infty$  was solved by global optimization in direct space using the DASH structure solution package<sup>8</sup>. The measured powder pattern at room temperature was subjected to a Pawley refinement<sup>9</sup> in space group  $P2_1/c$ , in order to extract correlated integrated intensities from the pattern. Good fits to the data were obtained. An internal coordinate description of the CH<sub>2</sub>SMe moiety was constructed using bond lengths and angles from ref[3]. The positions of the lithium cation as well as the position and orientation and torsion angles of the CH<sub>2</sub>SMe molecule in the unit cell were postulated and the trial structure

was subjected to a global optimization. The structures giving the best fit to the data in space group  $P2_1/c$  was validated by Rietveld refinement<sup>10</sup> of the fractional coordinates obtained at the end of the simulated annealing run using the GSAS program. To stabilize the refinement of the CH<sub>2</sub>SMe molecule, slack soft constraints for the bond lengths (C-S, C-H) and bond angles (H-C-S) were introduced.

- 1 R. E. Dinnebier and L. Finger, *Z. Krist.*, 1998, Supplement Issue **15**, 148.
- 2 J. W. Visser, *J. Appl. Crystallogr.*, 1969, **2**, 89.
- 3 A. Le Bail, H. Duroy and J. L. Fourquet, *Mater. Res. Bull.*, 1988, **23**, 447.
- 4 A. C. Larson and R. B. von Dreele, Los Alamos National Laboratory Report LAUR 86-748, *GSAS 1994, Version 2002 V*, 2002.
- 5 P. Thompson, D. E. Cox and J. B. Hastings, *J. Appl. Crystallogr.*, 1987, **20**, 79.
- 6 L. W. Finger, D. E. Cox and A. P. Jephcoat, *J. Appl. Crystallogr.*, 1994, **27**, 892.
- 7 P. W. Stephens, *J. Appl. Crystallogr.*, 1999, **32**, 281.
- 8 W. I. F. David, K. Shankland and N. Shankland, *Chem. Commun.*, 1998, 931.
- 9 G. S. Pawley, *J. Appl. Crystallogr.*, 1981, **14**, 357.
- 10 H. M. Rietveld, *J. Appl. Crystallogr.*, 1969, **2**, 65.

### 3. Rietveld Plot

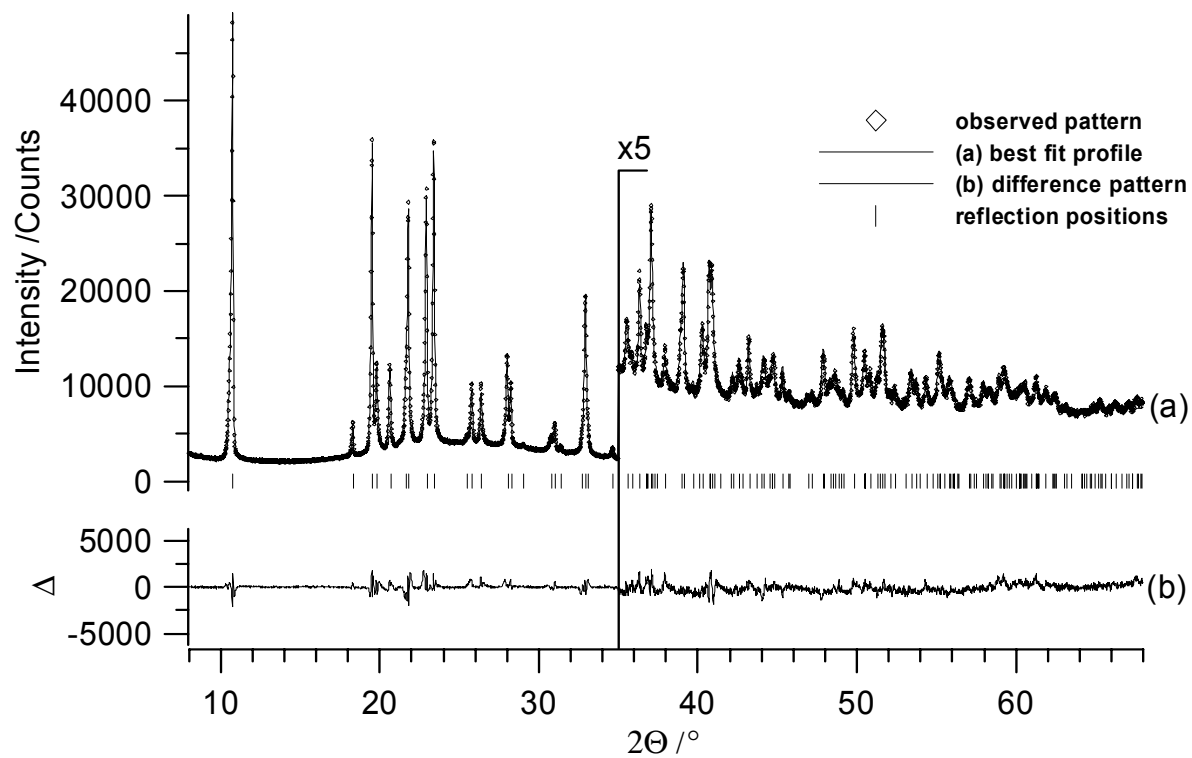

Supplement: b505096k.pdf [file b505096k.pdf]
